# Supplementary material for: Cytokine Profile and Immunoglobulin E-mediated Serological Food Hypersensitivity in Patients With Irritable Bowel Syndrome With Diarrhea
Source: PubMed Central journal article supplement — J Neurogastroenterol Motil. 2018 Jul 1;24(3):415–21. doi: 10.5056/jnm17114 (PMC6034672; doi:10.5056/jnm17114), 2018-07-01
Supplement: jnm-24-415_suppl.pdf [file jnm-24-415_suppl.pdf]

**Supplementary Table 1.** The Descriptions of 13 Cytokines Investigated in This Study

| Cytokine       | Description                                                                                                                                                                                                                                     |
|----------------|-------------------------------------------------------------------------------------------------------------------------------------------------------------------------------------------------------------------------------------------------|
| IFN- $\gamma$  | A cytokine associated innate and adopted immune response. IFN- $\gamma$ activates antigen presenting cells such as macrophage and promotes Th1 cell differentiation.                                                                            |
| MIP-1 $\alpha$ | A chemokine produced by macrophage. MIP-1 $\alpha$ activates granulocytes and promotes pro-inflammatory cytokine production.                                                                                                                    |
| Eotaxin        | One of a major chemokine that induces recruitment of eosinophils and is involved allergic responses.                                                                                                                                            |
| IL-1 $\beta$   | A pro-inflammatory cytokine mainly produced by macrophages. IL-1 $\beta$ promotes activation of inflammatory cells and production of acute-phase proteins.                                                                                      |
| IL-4           | A Th2 cytokine that induces differentiation and proliferation of Th2 cells. IL-4 promotes antibody production and class switching.                                                                                                              |
| IL-5           | A Th2 cytokine associated with allergic diseases. IL-5 is involved in differentiation, proliferation and activation of eosinophils.                                                                                                             |
| IL-6           | A pro-inflammatory cytokine detected acute and chronic inflammatory states. IL-6 induces differentiation and proliferation of Th17 cells.                                                                                                       |
| IL-8           | A chemokine that induces chemotaxis mainly in neutrophils. IL-8 is one of the major mediators of inflammation.                                                                                                                                  |
| IL-10          | An anti-inflammatory cytokine to suppress differentiation of Th1 cell, activation of macrophages and promote pro-inflammatory cytokines.                                                                                                        |
| IL-12p70       | A cytokine that induces differentiation of Th1 cells and stimulates secretion of Th1 cytokines such as IFN- $\gamma$ .                                                                                                                          |
| IL-13          | One of a Th2 cytokine that promotes proliferation of B cells and IgE production. IL-13 regulates goblet cells functions in lung and gut.                                                                                                        |
| IL-17          | A cytokine secreted Th17 cells. It promotes inflammatory response through enhancing production of pro-inflammatory cytokines and chemokines.                                                                                                    |
| TNF- $\alpha$  | TNF- $\alpha$ is one of the major pro-inflammatory cytokine involved local and systemic inflammation. TNF- $\alpha$ is mainly produced by macrophages and induces fever, activation of macrophages, neutrophils, T cells and endothelial cells. |

Th, T helper cells; MIP-1 $\alpha$ , macrophage inflammatory protein-1 alpha.

**Supplementary Table 2.** Gastrointestinal Symptom Rating Scale Scores Obtained by Bootstrapping in Patients With Irritable Bowel Syndrome With Diarrhea

| (mean [95% CI]) | IgE-mediated serological food hypersensitivity |                   | P-value |
|-----------------|------------------------------------------------|-------------------|---------|
|                 | Negative (n = 40)                              | Positive (n = 20) |         |
| Reflux          | 1.78 (1.5-2.1)                                 | 2.06 (1.6-2.5)    | 0.303   |
| Abdominal pain  | 2.43 (2.0-2.8)                                 | 2.34 (1.9-2.8)    | 0.787   |
| Indigestion     | 2.31 (2.0-2.6)                                 | 2.21 (1.9-2.4)    | 0.669   |
| Diarrhea        | 4.28 (3.8-4.7)                                 | 4.35 (3.8-4.8)    | 0.866   |
| Constipation    | 2.31 (2.1-2.6)                                 | 2.12 (1.8-2.5)    | 0.431   |

The subject who has at least one food allergen with class 2 or above was considered as being positive for IgE-mediated serological food hypersensitivity. Mean, 95% confidence intervals and P-value were obtained by Bootstrapping and student t test.

**Supplementary Table 3.** Correlations Provided as *r* Value Between Serum Cytokine Levels and Gastrointestinal Symptom Scores in Patients With Irritable Bowel Syndrome With Diarrhea

| Serum cytokine | Reflux | Abdominal pain | Indigestion | Diarrhea | Constipation |
|----------------|--------|----------------|-------------|----------|--------------|
| IL-1 $\beta$   | -0.035 | 0.115          | -0.022      | 0.211    | -0.198       |
| MIP-1 $\alpha$ | -0.025 | -0.013         | -0.066      | 0.090    | -0.096       |
| IL-6           | -0.068 | 0.054          | -0.154      | 0.154    | -0.011       |
| IL-8           | 0.054  | 0.173          | -0.101      | 0.095    | -0.136       |
| TNF- $\alpha$  | -0.132 | -0.041         | -0.055      | 0.023    | -0.116       |

MIP-1 $\alpha$ , macrophage inflammatory protein-1alpha.

*P*-value and *r* value was calculated by the Spearman test. *P* < 0.05.

**Supplementary Table 4.** Comparison of Serum Cytokine Profile Obtained by Bootstrapping Between IgE-mediated Serological Food Hypersensitivity Negative and Positive in Patients With Irritable Bowel Syndrome With Diarrhea

| Serum cytokine level<br>(mean [CI], pg/mL) | IgE-mediated serological food hypersensitivity |                      | <i>P</i> -value |
|--------------------------------------------|------------------------------------------------|----------------------|-----------------|
|                                            | Negative (n = 40)                              | Positive (n = 20)    |                 |
| IL-1 $\beta$                               | 8.6 (4.3-14.4)                                 | 5.7 (2.2-9.3)        | 0.392           |
| IFN- $\gamma$                              | 27.7 (18.4-39.7)                               | 20.1 (11.6-31.1)     | 0.342           |
| MIP-1 $\alpha$                             | 538.8 (362.1-758.8)                            | 331.3 (135.1-612.7)  | 0.196           |
| Eotaxin                                    | 166.3 (143.1-189.7)                            | 164.6 (120.1-211.4)  | 0.939           |
| IL-6                                       | 53.7 (35.5-79.1)                               | 33.3 (10.5-70.1)     | 0.300           |
| IL-8                                       | 788.8 (525.5-1049.5)                           | 593.9 (266.1-1010.5) | 0.416           |
| IL-10                                      | 15.9 (4.7-36.7)                                | 8.3 (3.9-13.8)       | 0.512           |
| IL-12p70                                   | 26.0 (10.7-47.9)                               | 14.1 (4.1-25.3)      | 0.349           |
| IL-13                                      | 53.3 (26.6-83.1)                               | 61.9 (16.3-128.1)    | 0.793           |
| IL-17                                      | 11.3 (7.1-16.2)                                | 5.6 (3.2-8.4)        | 0.057           |
| TNF- $\alpha$                              | 71.6 (50.7-96.1)                               | 35.5 (21.3-53.4)     | 0.031           |

MIP-1 $\alpha$ , macrophage inflammatory protein-1alpha.

The subject who has at least one food allergen with class 2 or above was considered as being positive for IgE-mediated serological food hypersensitivity. mean, 95% confidence intervals and *P*-value were obtained by Bootstrapping and student *t* test.

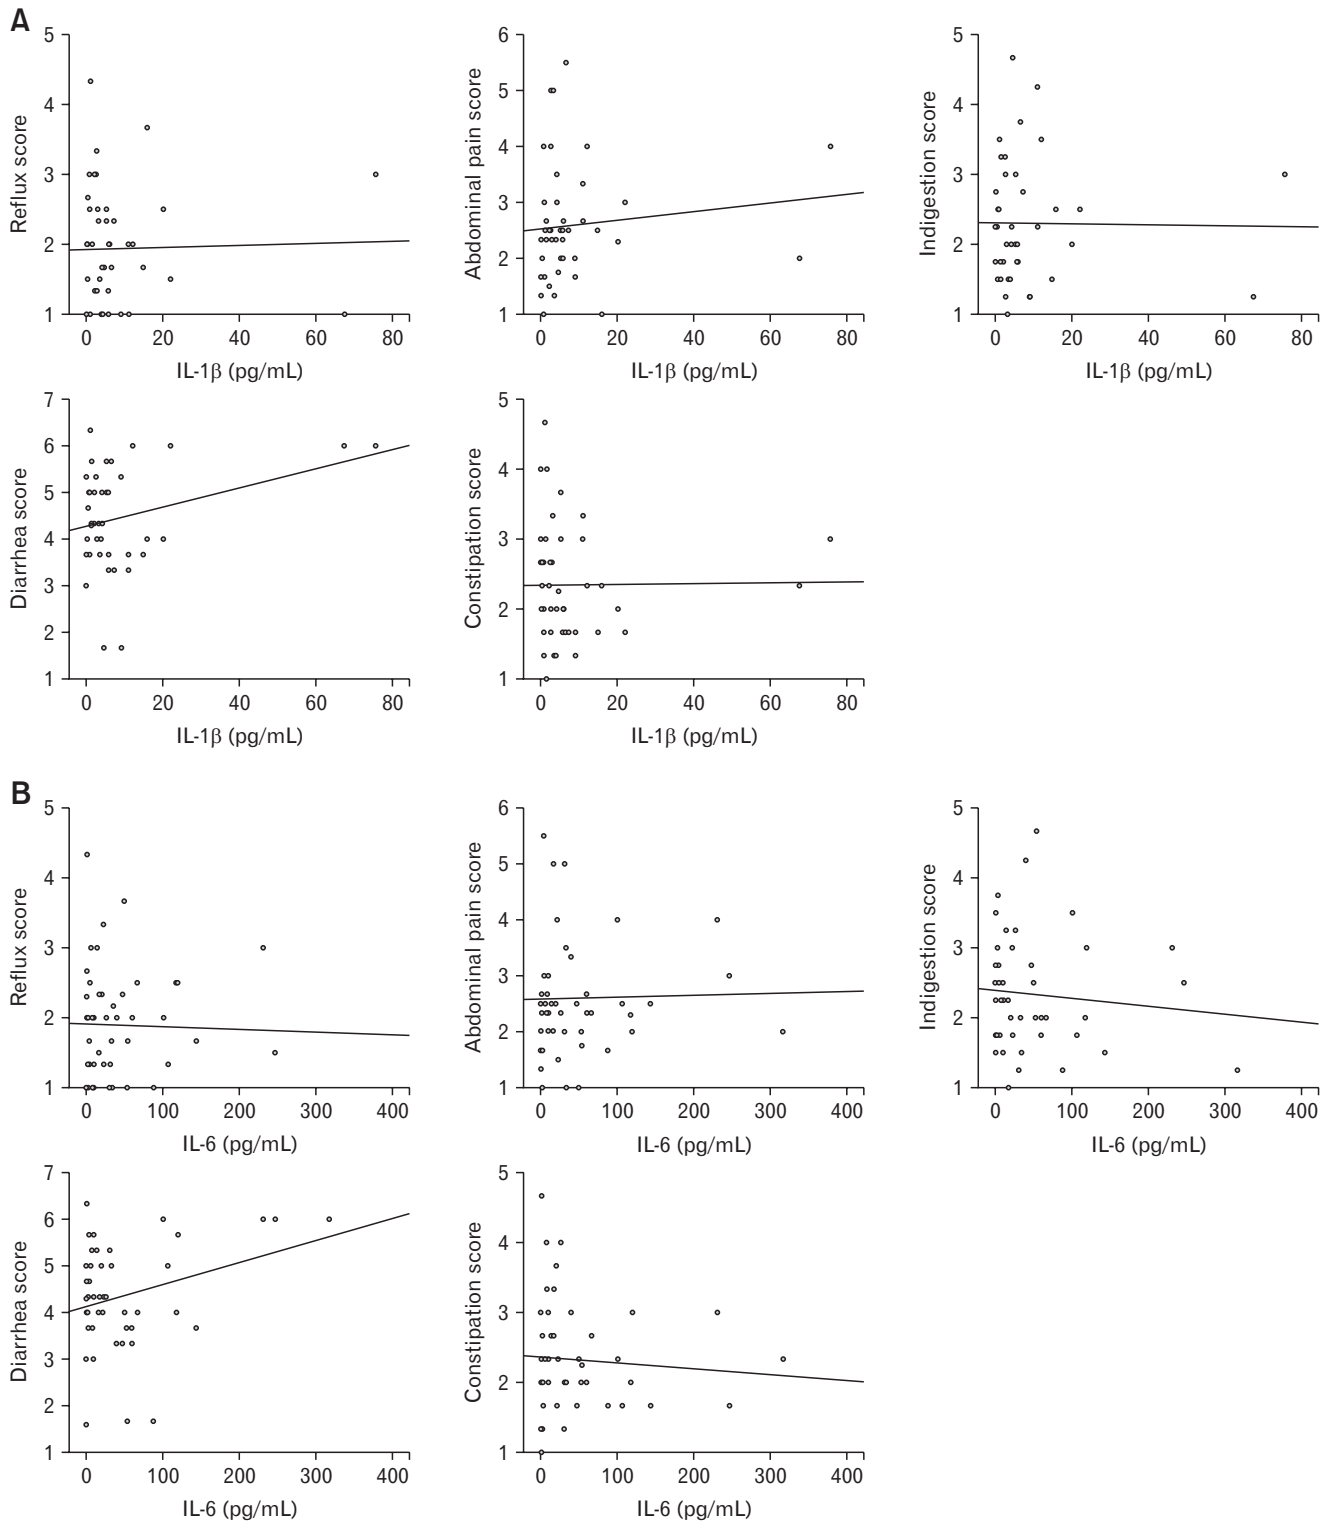

**Supplementary Figure.** Correlations presented as  $r$  value between serum cytokine levels and gastrointestinal symptom scores in patients with irritable bowel syndrome with diarrhea (IBS-D). MIP-1 $\alpha$ , macrophage inflammatory protein-1alpha. (A) Correlations between serum IL-1 $\beta$  levels and gastrointestinal symptom scores. (B) Correlations between serum IL-6 levels and gastrointestinal symptom scores. (C) Correlations between serum IL-8 levels and gastrointestinal symptom scores. (D) Correlations between serum MIP-1 $\alpha$  levels and gastrointestinal symptom scores. (E) Correlations between serum TNF- $\alpha$  levels and gastrointestinal symptom scores.

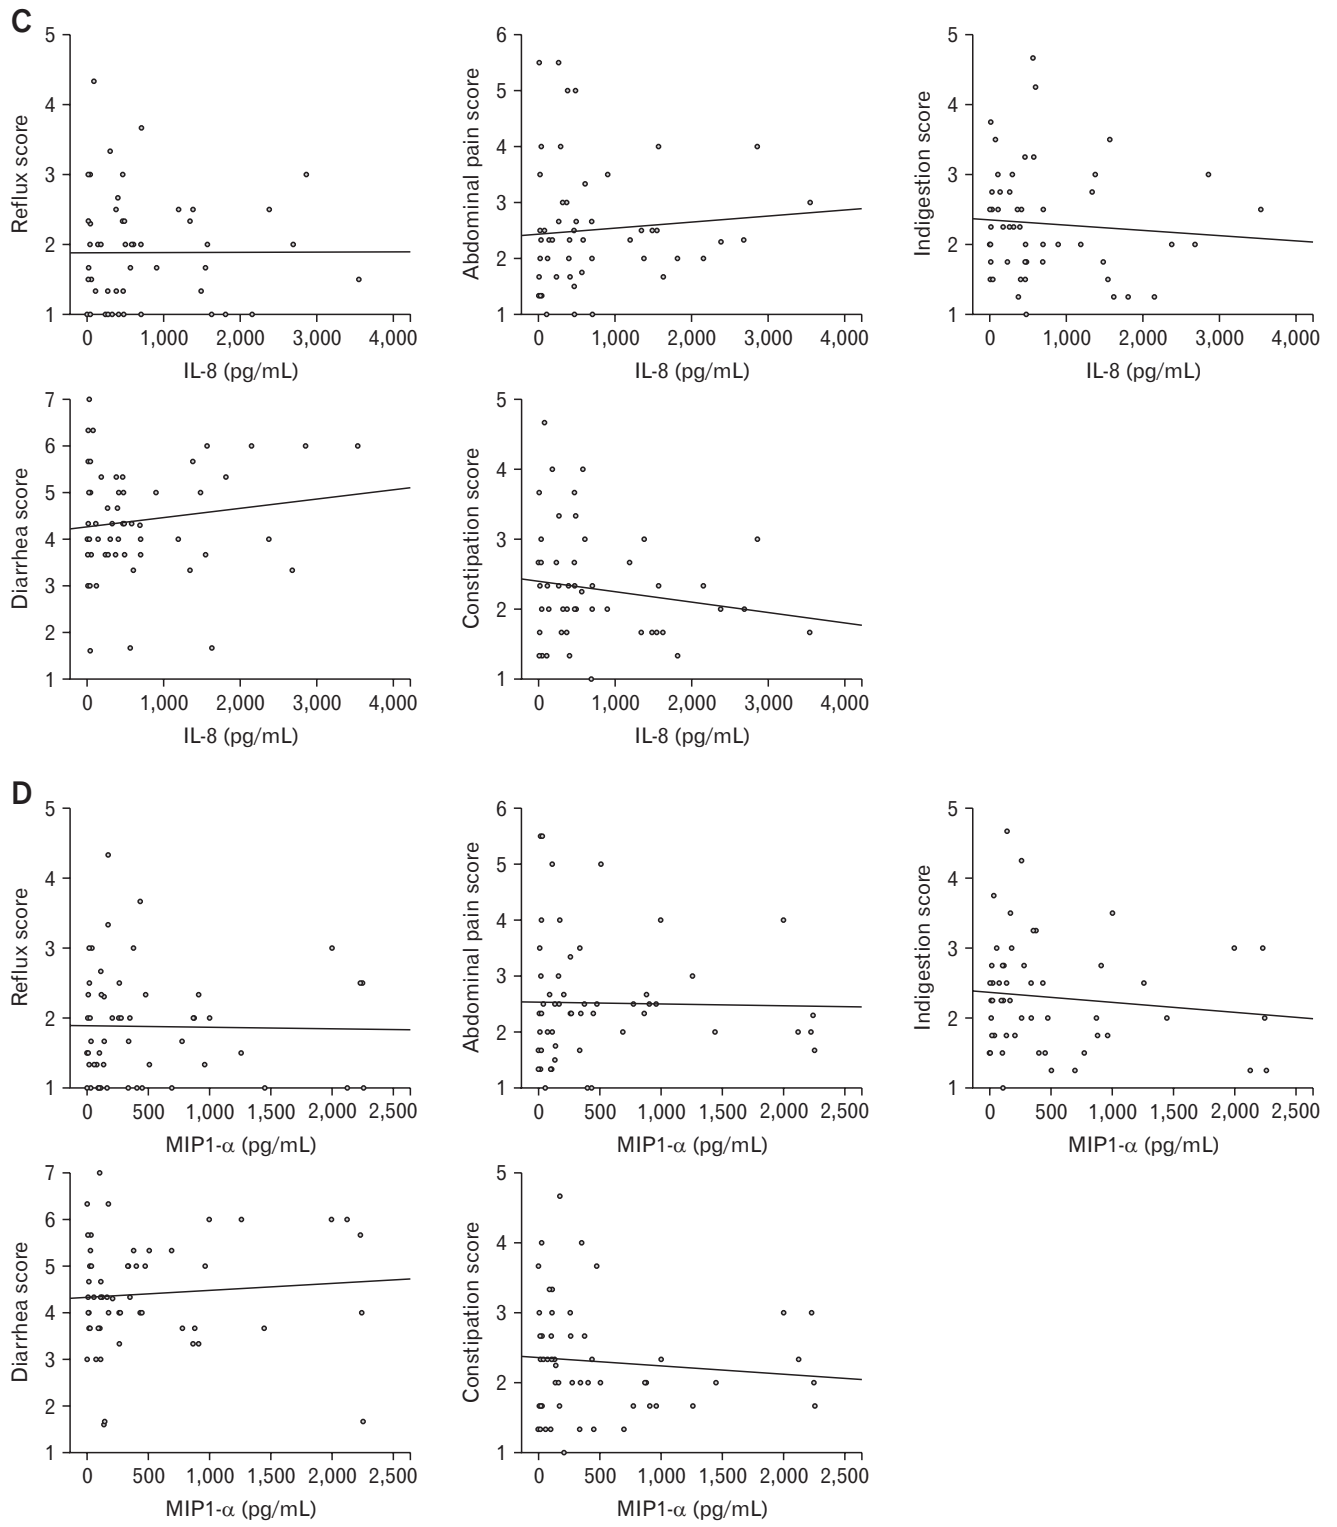

**Supplementary Figure.** Continued.

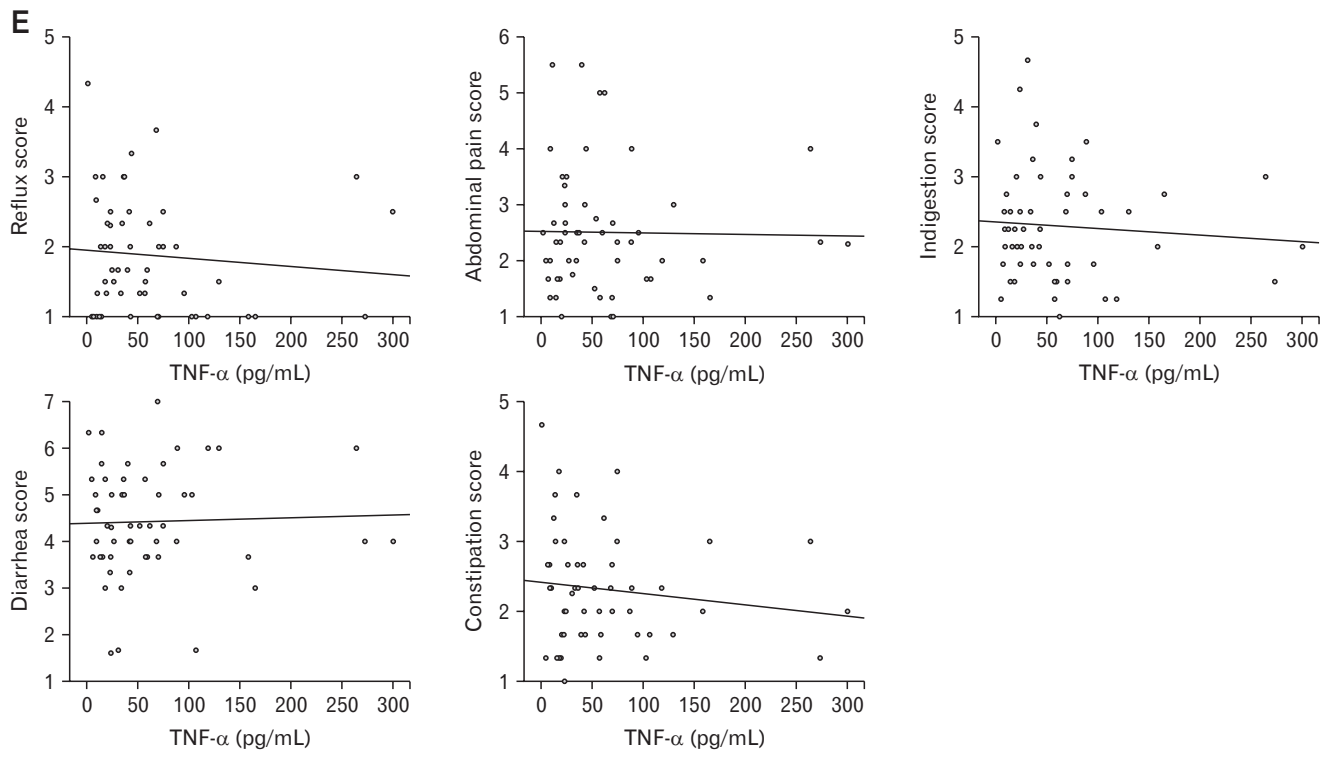

**Supplementary Figure.** Continued.
